# Supplementary material
Source: HighWire-hosted journal article supplement (https://jnm.snmjournals.org/highwire/filestream/94084/field_highwire_adjunct_files/0/69880_Supplemental_Figures.pdf)
Supplement: 69880_Supplemental_Figures.pdf [file 69880_Supplemental_Figures.pdf]

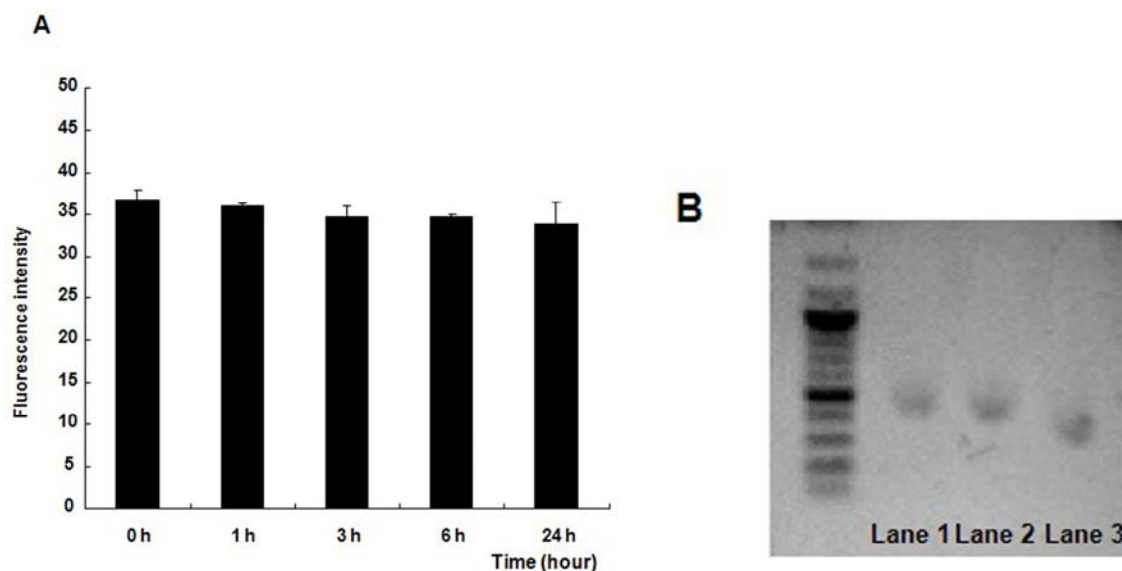

**SUPPLEMENTAL FIGURE 1.** (A) The stability test with rhodamine dye in the MFR-AS1411 was examined on the condition of in PBS buffer. After the MFR-AS1411 particles were incubated with PBS buffer, for a given time, similar fluorescence intensity was found at an incubated time of 0 hr and at 24 hr. Brief sonication of each MFR-AS1411 sample was performed to disperse the MFR-AS1411 particles. (B) The conjugation pattern between MF-AS1411 and MF was verified and measured by gel electrophoresis. After conjugation of MF with the AS1411 aptamer, each sample (Lane 1; MF-AS1411, Lane 2; MF-AS1411mt, Lane 3; naked MF) was loaded onto a 1% agarose gel. The different band locations are shown for the AS1411-(or AS1411mt-) conjugated MF and the naked MF particle.

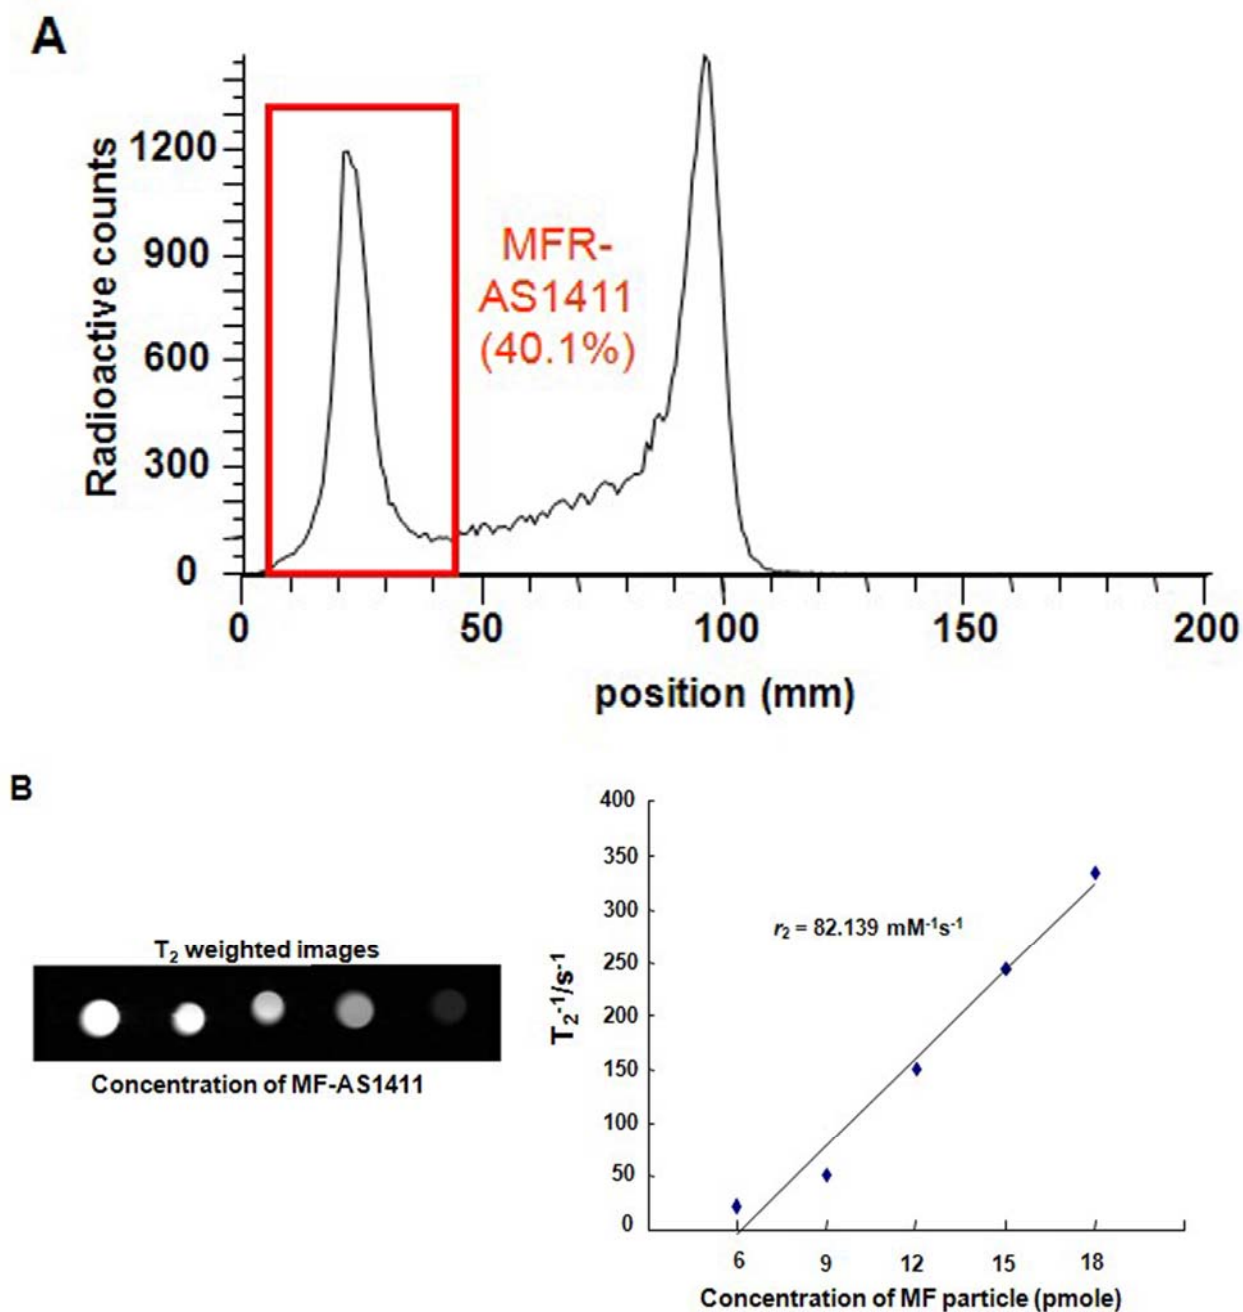

**SUPPLEMENTAL FIGURE 2.** (A) TLC analysis was performed for the detection of the labeling efficiency of MF-AS1411 and  $^{67}\text{Ga}$ -citrate. The labeling efficiency of MF-AS1411 was measured by TLC analysis and was 40.1%. (B)  $T_2$ -weighted images were acquired using a 1.5 tesla MR. A linear plot for the value of specific relaxivity was determined according to the increase in the concentration of MF-AS1411.

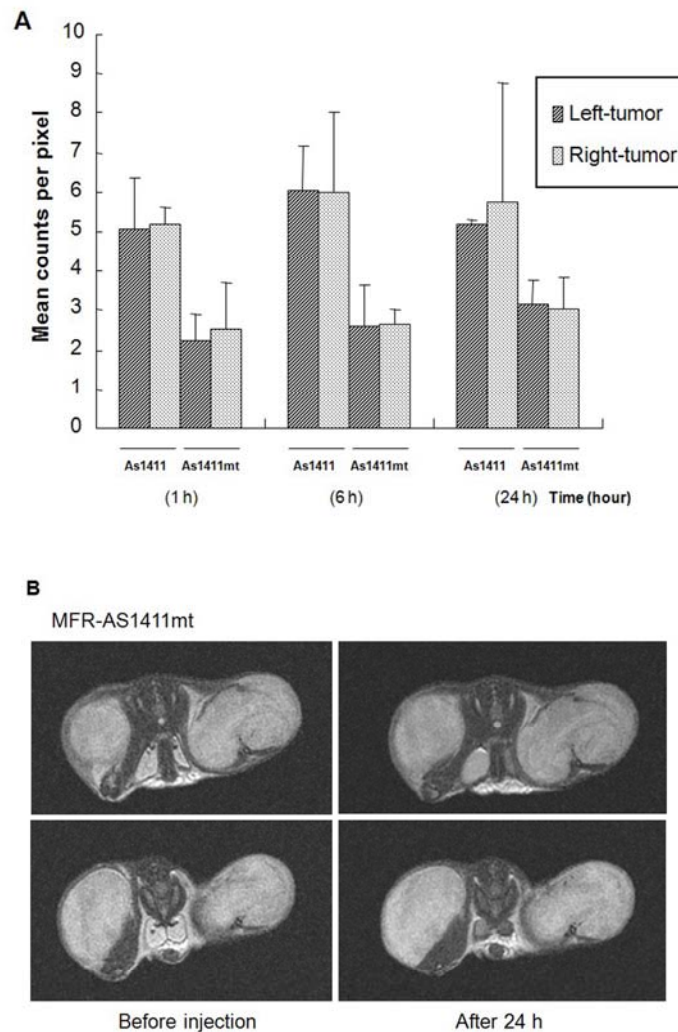

**SUPPLEMENTA/ FIGURE 3.** (A)  $^{67}\text{Ga}$ -radioactivity at the tumor site in the MFR-AS1411 (or MFR-AS1411mt) injected mice was quantitatively measured by the ROI analysis. The radioactivity in the MFR-AS1411 injected group was higher than that in the MFR-AS1411mt injected group. P values between MFR-AS1411 treated and MFR-AS1411mt treated group at 1, 6, 24 hr were 0.15 (left-tumor at 1 hr), 0.08 (right-tumor at 1hr), 0.12 (left-tumor at 6 hr), 0.16 (right-tumor at 6 hr), 0.25 (left-tumor at 24 hr), 0.4 (right-tumor at 24 hr), respectively. (B) T<sub>2</sub>-weighted MR images showed that there were no MR signals of the tumor area 24 hr after the injection of MFR-AS1411mt in tumor bearing mice.
